1 **LTR\_retriever: a highly accurate and sensitive program for identification of LTR**  
2 **retrotransposons**

3 Shujun Ou and Ning Jiang\*

4 Department of Horticulture, Michigan State University, East Lansing, MI, 48824, USA

5 ORCID: 0000-0001-5938-7180 (S.O.); 0000-0002-2776-6669 (N.J.)

6 \* To whom correspondence should be addressed. Tel: +1 (517) 353-0381; Fax: +1 (517) 353-0890;

7 Email: [jiangn@msu.edu](mailto:jiangn@msu.edu)

8 **ABSTRACT**

9 Long terminal-repeat retrotransposons (LTR-RTs) are prevalent in plant genomes. Identification of  
10 LTR-RTs is critical for achieving high-quality gene annotation. Based on the well-conserved structure,  
11 multiple programs were developed for *de novo* identification of LTR-RTs; however, these programs  
12 are associated with low specificity and high false discovery rate (FDR). Here we report LTR\_retriever,  
13 a multithreading empowered Perl program that identifies LTR-RTs and generates high-quality LTR  
14 libraries from genomic sequences. LTR\_retriever demonstrated significant improvements by  
15 achieving high levels of sensitivity (91.8%), specificity (94.7%), accuracy (94.3%), and precision  
16 (90.6%) in model plants. LTR\_retriever is also compatible with long sequencing reads. With 40k self-  
17 corrected PacBio reads equivalent to 4.5X genome coverage in Arabidopsis, the constructed LTR  
18 library showed excellent sensitivity and specificity. In addition to canonical LTR-RTs with 5'-  
19 TG..CA-3' termini, LTR\_retriever also identifies non-canonical LTR-RTs (non-TGCA), which have  
20 been largely ignored in genome-wide studies. We identified seven types of non-canonical LTRs from  
21 42 out of 50 plant genomes. The majority of non-canonical LTRs are *Copia* elements, with which the  
22 LTR is four times shorter than that of other *Copia* elements, which may be a result of their target  
23 specificity. Strikingly, non-TGCA *Copia* elements are often located in genic regions and  
24 preferentially insert nearby or within genes, indicating their impact on the evolution of genes and  
25 potential as mutagenesis tools.

26 **Keywords:** LTR retrotransposon, LTR\_retriever, transposable element, genome annotation, evolution

27 **INTRODUCTION**

28 Transposable elements (TEs) are ubiquitous interspersed repeats in most sequenced eukaryote  
29 genomes (Wessler 2006). According to their transposition schemes, TEs are categorized into two  
30 classes. Class I TEs (retrotransposons) use RNA intermediates with a “copy and paste” transposition  
31 mechanism (Kumar and Bennetzen 1999; Wicker, et al. 2007). Class II TEs (DNA transposons) use  
32 DNA intermediates with a “cut and paste” mechanism (Feschotte and Pritham 2007; Wicker, et al.  
33 2007). Depending on the presence of long terminal repeats (LTRs), Class I TEs are further classified  
34 as LTR retrotransposons (LTR-RTs) and non-LTR retrotransposons, including short interspersed  
35 transposable elements (SINEs) and long interspersed transposable elements (LINEs) (Han 2010). For  
36 simplicity, TEs other than LTR-RT, including both non-LTR retrotransposons and DNA transposons,  
37 are called non-LTR in this study. In plants, LTR-RTs contribute significantly to genome size  
38 expansion due to their high copy number and large size (Rensing, et al. 2008; Schnable, et al. 2009;  
39 Nystedt, et al. 2013; Ming, et al. 2015). For example, retrotransposons contribute to -approximately  
40 75% to the size of the maize (*Zea mays*) genome (Schnable, et al. 2009). In *Oryza australiensis*, a  
41 wild relative of rice (*O. sativa*), the amplification of three families of LTR retrotransposons is  
42 attributed to the genome size doubling within the last 3 million years (MY) (Piegu, et al. 2006). The  
43 amplification and elimination of LTR-RTs has shaped genome landscapes (Ammiraju, et al. 2007;  
44 Ammiraju, et al. 2010), thereby affecting the expression of adjacent genes (Hollister and Gaut 2009;  
45 Hollister, et al. 2011; vonHoldt, et al. 2012; Makarevitch, et al. 2015).

46 An intact LTR-RT carries an LTR at both termini (**Fig 1A**). The LTR regions usually span 85-  
47 5000 base pairs (bp) with intra-element sequence identity  $\geq 85\%$ . In plants, LTRs are typically flanked  
48 by 2 bp palindromic motifs (**Fig 1A**), commonly 5'-TG..CA-3' (Zhao, et al. 2016) with some rare  
49 exceptions. For instance, the first active TE detected in rice, the *Tos17* LTR element has a 5'-  
50 TG...GA-3' motif (Hirochika, et al. 1996). The sequence between the 5' and 3' LTR is defined as the  
51 internal region and usually ranges from 1,000-15,000 bp (**Supplementary Fig S1**). To confer  
52 transposition activities, the internal region of most autonomous LTR elements should contain a primer  
53 binding site (PBS), a polypurine tract (PPT), a *gag* gene (i.e., encoding structural proteins for reverse  
54 transcription), and a *pol* gene (i.e., functioning as protease, reverse transcriptase, and integrase)  
55 (Havecker, et al. 2004). Depending on the order of protein domains in the *pol* gene, intact LTR-RTs  
56 can be further categorized into two families called *Gypsy* and *Copia* (Kumar and Bennetzen 1999). If

57 the internal region does not contain any open reading frames (ORFs), e.g., reverse transcriptase genes,  
58 the belonging LTR-RT is unable to transpose independently, and it relies on the transposition-related  
59 proteins from other autonomous LTR-RTs (Havecker, et al. 2004; Jiang 2016). There are two groups  
60 of non-coding LTR-RTs: terminal-repeat retrotransposon in miniature (TRIM) (Havecker, et al. 2004;  
61 Gao, et al. 2012) and large retrotransposon derivatives (LARD) (Havecker, et al. 2004). These non-  
62 coding LTR-RTs are distinguished by their average length: TRIMs are < 1 kb and LARDs are 5.5-9kb  
63 (Havecker, et al. 2004; Jiang 2016).

64 The insertion of an LTR-RT is accompanied by the duplication of a small piece of sequence  
65 immediately flanking the element, which is called target site duplication (TSD, 4-6 bp in length) (**Fig**  
66 **1A**). There are many mechanisms that can introduce mutations to a newly transposed LTR-RT. Due to  
67 the sequence similarity between the long direct repeat of an LTR-RT, intra-element recombination can  
68 occur, leading to the elimination of the internal region and the formation of a solo-LTR (**Fig 1C**). The  
69 number of solo LTRs indicate the frequency and efficiency of LTR removal in a genome (Tian, et al.  
70 2009). New LTR-RT insertions can be silenced by methylation and chromatin modification as a  
71 genomic mechanism to suppress expression (Fedoroff 2012; vonHoldt, et al. 2012). Silenced elements  
72 have less selection constraint and accumulate more mutations including deletions, resulting in  
73 truncated LTR-RTs (**Fig 1B**). Truncated LTR-RT could also be the product of illegitimate  
74 recombination which generates deletions and translocations (Tian, et al. 2009; Zhao, et al. 2016).  
75 LTR-RTs often insert into other LTR-RTs, generating nested LTR-RTs (**Fig 1D**) (SanMiguel, et al.  
76 1998; Tian, et al. 2009; Levy, et al. 2010). Given these mutation mechanisms, intact elements only  
77 contribute a small fraction of all LTR-RT related sequences in a genome. If the required structural  
78 components are altered, i.e., mutated, truncated, and nest-inserted by other TEs (**Fig 1**), the LTR  
79 element becomes non-autonomous and is difficult to identify using structural information.

80 Although the structure of LTR-RT is conserved among species, their nucleotide sequences are not  
81 conserved except among closely related species. Particularly, substantial sequence diversity is  
82 observed within the long terminal repeat region. Therefore, LTR-RTs are usually not identified based  
83 on sequence homology. Due to the lack of nucleotide sequence similarity among species, constructing  
84 a species-specific LTR library (i.e., exemplars) is essential for identification of all LTR-RT related  
85 sequences in a newly sequenced genome.

86 Computational identification of LTR-RTs based on structural features has been implemented  
87 multiple times. Such methods are usually used jointly to maximize power in genome annotation  
88 projects. However, inconsistent results are often obtained from these tools (Hoen, et al. 2015), which  
89 could be due to the differences in defining the LTR structure in the program and the different  
90 implementation of these methods. LTR\_STRUC was one of the earliest developments of genome-  
91 wide LTR identification programs (McCarthy and McDonald 2003), but its scalability and  
92 computational potency is limited by the Windows platform. LTR\_finder (Xu and Wang 2007) and  
93 LTRharvest (Ellinghaus, et al. 2008) are by far the most sensitive programs in finding LTRs.  
94 Nevertheless, these programs suffer from reporting large numbers of false positives (Lerat 2010).  
95 MGEScan-LTR is another early development of LTR searching programs (Rho, et al. 2007). Its recent  
96 update on the web-based platform allows wider usage (Lee, et al. 2016), but is still associated with the  
97 issue of false identifications. As the most sizeable content of plant genomes, the assembly of LTR-RTs  
98 in plant genomes is typically compromised due to the collapse of short reads from such regions.  
99 Fragmented and misassembled repetitive sequences could lead to further error propagation in  
100 downstream genome annotation. Unfortunately, most of the current programs are not well adapted to  
101 the nature of draft genomes.

102 In this study, we introduce LTR\_retriever, a novel tool for identification of LTR-RTs. This  
103 package efficiently removes false positives from initial software predictions. We benchmarked the  
104 performance of LTR\_retriever with existing programs using the well assembled and annotated rice  
105 genome (International Rice Genome Sequencing Project 2005) as well as other high-quality monocot  
106 and dicot model genomes, e.g., maize (Jiao, et al. 2017), sacred lotus (*Nelumbo nucifera*) (Ming, et al.  
107 2013), and Arabidopsis (*Arabidopsis thaliana*) (Arabidopsis Genome Initiative 2000). Our results  
108 indicated that LTR\_retriever achieved very high specificity, accuracy, and precision without  
109 significantly sacrificing sensitivity, hence significantly outperforming existing methods. In addition,  
110 we implemented a module to accurately search for non-canonical LTR-RTs that featured non-TGCA  
111 motifs in LTR regions. A search in 50 published genomes identified seven types of non-canonical  
112 LTR-RTs, which are mainly *Copia* elements with substantially shorter length compared to regular  
113 *Copia* elements. Further characterizations show that non-canonical LTR-RTs are less abundant in the

114 genomes but preferentially inserted into genic regions. Finally, we demonstrated the feasibility of  
115 making high-quality LTR libraries from self-corrected PacBio reads.

## 116 **NEW APPROACHES**

117 *De novo* prediction of LTR-RTs can produce large amounts of false positives. To detect and filter  
118 out non-LTR sequences and obtain high-quality LTR-RT exemplars (representative LTR-RT  
119 sequences), we developed eight modules with adjustable parameters in LTR\_retriever (**Fig 2**). A  
120 detailed description of each individual module can be found in **Supplementary Methods**.

## 121 **RESULTS**

122 Recovery of LTR elements based on structural features has been implemented in multiple  
123 packages. However, high level of false positive is a key issue. It is possible to reduce false positives  
124 by defining more stringent parameters such as high LTR similarity, intermediate LTR length, and  
125 “TGCA” motif (**Fig 3, Supplementary Table S1**). Unfortunately, the level of false negatives becomes  
126 high when more stringent parameters are applied (**Fig 3, Supplementary Table S1**). The trade-off  
127 between sensitivity and specificity cannot be minimized by merely adjusting parameters of existing  
128 tools (**Fig 3, Supplementary Table S1**). To establish efficient filters, it is essential to understand the  
129 fundamental differences between true LTR elements and false positives. In this study, we employed  
130 four statistical metrics (sensitivity, specificity, accuracy, and precision) to evaluate the performance of  
131 LTR-RT recovery programs (**Materials and Methods**).

### 132 **Features of LTR false positives and solutions**

133 In genome assembling practices, one of the most difficult tasks is to assemble highly repetitive  
134 regions. Even in the best-assembled genomes, there are still gaps to be filled. In assemblies of non-  
135 overlapping scaffolds, sequence space (gaps) is manually added based on their inferred order. For a  
136 piece of sequence with gaps, it is not uncommon that genome assemblers mistakenly join two similar  
137 sequences that belong to different transposable elements from the same family. Under these situations,  
138 the ambiguous sequence replaced by gaps is much less reliable than continuous sequence.

139 Tandem repeats are locally duplicated sequences of two or more bases such as centromere repeats  
140 and satellite sequences (Benson 1999). Although it is possible that an LTR element carries small  
141 portions of tandem repeats, it becomes an LTR false positive when the majority sequence of an LTR-

142 RT candidate consists of tandem repeats including low complexity sequences. We deploy **Module 1** in  
143 LTR\_retriever to eliminate candidates that contain substantial amounts of gaps and tandem repeats  
144 (**Fig 2, Supplementary Methods**). **Module 1** also controls sequence length in consideration of both  
145 extremely long (15KB) and short (100bp) LTR-RT. The broad range of length settings allows  
146 LTR\_retriever to identify very short elements like TRIM or exceptionally long elements. The  
147 implementation of **Module 1** allows LTR\_retriever to exclude 4~12% of total candidates which are  
148 very likely false positives.

149 Identifying the exact boundaries of an LTR candidate is critical for further structural analysis  
150 such as motifs and TSDs. Published methods have applied some schemes to define boundaries. In  
151 practice, we found that the external boundaries of an LTR candidate were defined quite precisely by  
152 these prediction methods. However, for the internal boundaries which define the start and end of the  
153 internal region, predictions of existing methods are often incorrect. By manual inspections, we found  
154 the percentage of inaccurate internal boundary could be as high as 30%. The misdefined internal  
155 boundary of an LTR candidate will result in an incorrect prediction of LTR structures, such as motif,  
156 PBS, and PPT, which is likely to fail in the next filtering steps. We thus developed **Module 2** for  
157 correction of the internal boundaries of raw LTR predictions (**Fig 2, Supplementary Methods**),  
158 which could recover an extra 27% high-quality LTR candidates in the rice genome.

159 LTR-RT features with long terminal repeat flanking each side of the internal region. To  
160 exhaustively search for LTR candidates from genomic sequences, most published tools start with  
161 finding sequence alignments that are close to each other. This approach can effectively identify LTR  
162 elements featured with a pair of long terminal repeats as well as finding non-LTR TE pairs that are  
163 similar to each other (**Fig 1**). Such non-LTR TE fragments could be contributed by tandem repeats,  
164 DNA TEs, SINEs, LINEs, solo-LTRs from the same LTR-RT family, or other repetitive sequences  
165 including tandemly located gene families. Excluding such LTR-like false positives is challenging.  
166 Moreover, consider that some TEs prefer to insert into other TE sequences, TE clusters are frequently  
167 found (SanMiguel, et al. 1998; Bergman, et al. 2006). The dense distribution of TEs creates a  
168 significant amount of false LTRs in *de novo* predictions. With close inspection, we found that in most  
169 cases, the intra-element sequence similarity of such false positives extended beyond the predicted  
170 boundary of the direct repeat (**Fig 1E**). In contrast, for a true LTR-RT, the sequence alignment

171 terminates at the boundary of the LTR region. This represents an important structural feature that  
172 could distinguish LTR-RTs and its false positives. Another distinctive feature between true LTR and  
173 such false positives is the existence of TSDs. In an LTR-RT, TSDs flanking the element are identical  
174 (**Fig 1A**). However, in an LTR false positive, sequences at each end have different origins (**Fig 1E**).  
175 For 4-6 bp random sequences, the possibility of one being identical to the other is 0.02-0.39%, which  
176 is very unlikely. To utilize the structural difference between LTR-RT and false positives, **Module 3**  
177 was developed (**Fig 2, Supplementary Methods**) to exclude elements with extended alignment  
178 beyond LTR regions and those without a TSD immediately flanking the termini of LTRs. Benefiting  
179 from the accurate boundaries of candidate elements corrected by **Module 2**, this module could  
180 effectively identify most of the false positives which could account for nearly half (42.6%) of total  
181 LTR candidates.

182 **Module 3** also allows fine-grained adjustment of the internal and external element boundaries by  
183 jointly searching TSDs and motifs. As LTR-RTs are predominantly represented by 5 bp TSD and the  
184 5'-TG..CA-3' motif, searching for such sequence structure at the termini of direct repeats is prioritized.  
185 If the canonical motif is absent, the seven non-canonical motifs (**Supplementary Table S2**) is  
186 searched instead. This function allows LTR\_retriever flexibly while accurately characterizing the  
187 terminal structure of an LTR candidate. In rice, up to 99% of recognized LTR-RTs carry the canonical  
188 5'-TG..CA-3' motif immediately flanked by 5 bp TSDs, while less than 0.1% of LTR-RTs have non-  
189 canonical motifs with 5 bp TSDs. In other cases, LTR candidates were found carrying the canonical  
190 motif with TSDs less than 5bp, which could be due to inter-element recombination or mutation. For  
191 example, in the maize genome, LTR-RT with TSD length of 3 bp and 4 bp have 108 and 483  
192 occurrences out of 43,226 intact LTR-RTs, respectively.

193 Similar to retroviruses, direct repeats of a newly inserted LTR-RT are identical to each other.  
194 Based on the neutral theory (vonHoldt, et al. 2012), **Module 4** was developed for the estimation of  
195 insertion time of each intact LTR-RT (**Fig 2, Supplementary Methods**). We applied the Jukes-  
196 Cantor model for estimation of divergence time in noncoding sequences (Jukes and Cantor 1969). In  
197 the rice genome, more than 99% of intact LTR-RTs are inserted within 4 million years (MY) given  
198 the rice mutation rate of  $1.3 \times 10^{-8}$  mutations per site per year (Ma and Bennetzen 2004)  
199 (**Supplementary Fig S2**).

200 In the internal region of an LTR element, coding sequences like *gag*, *pol*, and *env* are usually  
201 found (**Fig 1A**) (Ellinghaus, et al. 2008), which could also help to discriminate LTR-RTs and non-  
202 LTRs efficiently. In **Module 5**, we applied the profile hidden Markov model (pHMM) to identify  
203 conserved protein domains that occur in LTR-RT candidate sequences (**Fig 2, Supplementary**  
204 **Methods**). A total of 102 TE-related pHMMs were identified using the rice TE library, with 55 non-  
205 LTR profiles and 47 LTR-RT profiles which include 30 *Gypsy* profiles, 9 *Copia* profiles and 8  
206 profiles with ambiguous LTR-RT family classifications (unknown). In rice, 82.6% of intact LTR-RTs  
207 could be classified as either *Copia* or *Gypsy* using **Module 5**. Furthermore, the direction of LTR-RT  
208 could be phased using the profile match information. Eventually, 60.5% of LTR-RTs in rice could be  
209 phased to either on the positive strand or negative strand. A BLAST-based search for non-LTR  
210 transposase and plant coding proteins in LTR-RT candidates are also implemented in **Module 5** for  
211 the further exclusion of non-LTR contaminations. About 1-4% of the candidate sequences were  
212 recognized as non-LTR originated and could be further eliminated.

213 After screening and adjustment of LTR candidates using **Module 1** to **Module 5**, the retained  
214 candidates are structurally intact LTR-RTs. However, since the screening criteria are very stringent,  
215 some true LTR-RTs could be excluded. Through manual inspection, we found that some LTR-RT  
216 candidates passed all the screening criteria but only have minor deletions at either the 5' or 3' termini,  
217 resulting in the failure in the identification of terminal structures. Such candidates are categorized as  
218 truncated LTR-RTs whose intact LTR region and the internal region will be retained if there is no  
219 highly similar copy in the intact LTR element pool. **Module 6** was designed to retain sequence  
220 information from truncated LTR-RTs which contributes about 10% of sensitivity increment of  
221 LTR\_retriever (**Fig 2, Supplementary Methods**).

222 New LTR-RT tends to insert into other LTR-RTs, creating nested insertions. To exclude nested  
223 insertions from the LTR exemplars, we developed a function in **Module 6**, which utilizes all newly  
224 identified LTR regions to search for homologous sequences in identified internal regions. This search  
225 could recognize and removes LTR-RTs that are nested in intact LTR-RTs. Using this method, about 8%  
226 of LTR-RT internal regions in rice and 67.7% in maize are identified as nested with other LTR  
227 elements. By removing such nested insertions, the library size can be reduced significantly without



228 sacrifice of sensitivity. More importantly, it avoids the misannotation of LTR sequences as internal  
229 regions.

### 230 **Construction of non-redundant LTR library**

231 Construction of the repeat library with non-redundant, high-quality TE sequences is critical for  
232 RepeatMasker-based TE and gene annotations, with the size of the repeat library being one of the  
233 limiting factors for speed. The required time for whole genome TE annotations using RepeatMasker is  
234 highly correlated to the size of TE libraries. Since the identified LTR-RTs are redundant, it would  
235 significantly speed up whole genome LTR-RT annotation if the redundancy is eliminated. To reduce  
236 redundancy of identified LTR-RTs, **Module 8** was developed using the clustering function of BLAST  
237 or CD-HIT. Due to the reduced redundancy and exclusion of nested insertions (**Module 6**), the LTR-  
238 RT sequence size was reduced to 10-30% of its original size. Accordingly, whole genome LTR-RT  
239 annotation could be accelerated ~4-fold with similar sensitivity comparing to a non-redundant LTR  
240 library.

### 241 **Comparison of performances to other LTR identification tools**

242 To compare the performance between LTR\_retriever and other existing methods, we employed  
243 the rice genome as a reference. The rice genome is one of the best sequenced and assembled genomes  
244 (International Rice Genome Sequencing Project 2005). To set a standard for our comparison study,  
245 we manually curated representative LTR elements obtained from the rice genome (cv. Nipponbare)  
246 and generated a compact repeat library which contains 897 sequences with the size of 2.34 Mb. The  
247 897 sequences represent 508 non-redundant LTR elements (**Supplementary Methods** and  
248 **Supplementary Sequence Files**). Using this library, LTR-RT contributes 23.5% of the assembled  
249 genome (374 Mb). This number is slightly higher than the two highest estimates from previous studies  
250 (20.6%, 22%) (Ma, et al. 2004; Chaparro, et al. 2007), suggesting the current identification of LTR  
251 retrotransposon in Nipponbare is close to saturation and the library is reasonably comprehensive. As a  
252 result, this library is used as a reference library for subsequent analysis. The accurate annotation of  
253 LTRs in the rice genome allows us to summarize the true positive (TP), true negative (TN), false  
254 positive (FP), and false negative (FN) of a *de novo* LTR prediction and annotation, hence allowing the  
255 evaluation of different methods.

256 The sensitivity of all existing LTR discovery tools was reported very high (Xu and Wang 2007;  
257 Ellinghaus, et al. 2008; You, et al. 2015), however, systematic evaluation of specificity using the  
258 whole genome sequence length is not available. Specificity describes the proportion of true negative,  
259 i.e., non-LTR sequences, being correctly ruled out, which is as important as sensitivity for evaluation  
260 of a diagnostic test (Zhu, et al. 2010). To better describe the performance of these methods, precision  
261 and accuracy are also calculated (Fawcett 2006). Precision, or positive predictive value, is the  
262 proportion of true positives, i.e., LTR sequences, among all positive results revealed by the test. The  
263 precision is an indication of false discovery rate (FDR), with the equation  $FDR=1-\text{precision}$ . Accuracy  
264 is the proportion of true predictions, which controls systemic errors and random errors (**Materials**  
265 **and Methods**).

266 For comparison, we chose four of the most widely used LTR searching methods, LTR\_STRUC  
267 (McCarthy and McDonald 2003), MGEScan-LTR (Rho, et al. 2007), LTR\_finder (Xu and Wang  
268 2007), and LTRharvest (Ellinghaus, et al. 2008), for performance benchmarks. As LTRharvest is the  
269 most flexible program with more than 20 modifiable parameters, we optimized the parameters based  
270 on our experience for more accurate predictions (**Fig 3**). The optimized parameters were also applied  
271 to the parameter settings of LTR\_finder and MGEScan-LTR. LTR\_retriever can utilize multiple input  
272 sources including the results from LTR\_finder, LTRharvest, and MGEScan-LTR. We used separate  
273 and combined inputs in LTR\_retriever for comparisons.

274 As expected, sensitivities of the most published methods are very high, ranging from 91.2% to  
275 95.3% (**Fig 3, Supplementary Table S1**). However, specificities of these methods are not desirable,  
276 ranging from 72.3% to 87.7% (**Fig 3, Supplementary Table S1**) with the exception of LTR-finder  
277 (91.0%). Specificity of 72.3% indicates that 27.7% of non-LTR genomic sequences were falsely  
278 recognized as LTR-RT sequences. The optimized parameters in LTRharvest led to an improvement of  
279 the specificity from 79.2% to 87.7% (**Supplementary Table S1**). The optimized LTR\_finder had the  
280 best balance, with sensitivity and specificity both reached to the level of 90%, however, its precision  
281 is only 75.8% (**Fig 3, Supplementary Table S1**). As a reminder,  $FDR=1-\text{precision}$ . Although  
282 LTR\_finder has the highest precision among the published methods, the precision of 75.8% indicates  
283 that 24.2% of “LTR-RT related sequences” identified in the genome were falsely reported as LTR-RT.  
284 The accuracy of existing methods ranges from 77.5-91.3%, showing variations in true prediction rate.

285 We tested LTR\_retriever using the optimized LTRharvest results as input. As a stringent filter,  
286 LTR\_retriever achieved specificity and accuracy of 96.8% and 95.5%, respectively, greatly  
287 outperforming existing methods (**Fig 3, Supplementary Table S1**). The precision also increased from  
288 the original 69.9% to 89.9%, indicating the FDR dropped to 1/3 and is among the lowest of all  
289 methods (**Fig 3, Supplementary Table S1**). Strikingly, the sensitivity of LTR\_retriever remained as  
290 high as 91.1% compared to the original 93.0%, meaning that we only sacrificed less than 2% of  
291 sensitivity to achieve the observed performance improvements (**Fig 3, Supplementary Table S1**).  
292 Other input sources such as those from LTR\_finder and MGEScan-LTR were also tested and showed  
293 excellent performance (**Supplementary Table S1**). Upon combination of two or more input sources,  
294 the sensitivity is increased to 94.5%, which is equivalent to the highest level that was achieved by the  
295 existing methods, providing a workaround to achieve comprehensive and high-quality predictions  
296 (**Supplementary Table S1**). By excluding the majority of false positives, the final library size was  
297 substantially reduced, from the largest 44.4 MB by MGEScan-LTR to the final 4.4 MB by the  
298 LTR\_retriever (**Supplementary Table S1**). The reduced library size significantly reduced the  
299 annotation time using RepeatMasker.

### 300 **Benchmarking on other genomes**

301 LTR\_retriever was developed based on the rice genome, which has demonstrated the highest  
302 specificity, accuracy, and precision among its counterparts with the same level of sensitivity. To test  
303 whether the excellent performance of LTR\_retriever can be reproduced with other genomes, we chose  
304 four other genomes with variable amounts of LTR elements including two maize genomes (cv. B73  
305 and cv. Mo17) (Xin, et al. 2013; Jiao, et al. 2017), Arabidopsis (Arabidopsis Genome Initiative 2000),  
306 and sacred lotus (Ming, et al. 2013). All these genomic sequences are associated with reasonable  
307 repeat libraries so that performance of LTR\_retriever could be evaluated by comparisons between the  
308 respective standard annotations and LTR\_retriever generated libraries.

309 For all the genomes we tested, LTR\_retriever demonstrated very sensitive and accurate  
310 performance in retrieving LTRs. Most metrics reached the levels of 90% (**Table 1**). For Arabidopsis,  
311 we obtained a very high specificity and accuracy, which were 98.9% and 98.4%, respectively,  
312 indicating the nearly perfect prediction by LTR\_retriever. For the ancient eudicot sacred lotus, the  
313 four metrics ranged from 81.2% to 91.3%. The maize genome is known to be highly repetitive, and

314 we used both the reference B73 (v4) and the Mo17 genomes to evaluate the performance of  
315 LTR\_retriever. With LTR-RTs comprising ~75% of the 2.1 GB genome, LTR\_retriever could identify  
316 91.1% and 95.7% LTR-RTs with specificities of 90.6% and 95.7%, respectively. Due to the high  
317 LTR-RT content and the nearly perfect performance of LTR\_retriever, the precisions reached 96.6%  
318 (FDR=3.4%) and 98.7% (FDR=1.3%), respectively. It is known that structure of the maize genome is  
319 very complex due to intensive nested TE insertions (SanMiguel, et al. 1996), LTR\_retriever is able to  
320 overcome complex structures and recover most LTR-RTs from the genome.

321 **Table 1.** Performance of LTR\_retriever on model plant genomes.

| Genomes          | Rice       |              |              |            |              |
|------------------|------------|--------------|--------------|------------|--------------|
|                  | Nipponbare | Sacred Lotus | Maize B73 v4 | Maize Mo17 | Arabidopsis* |
| Lib size (MB)    | 5.92       | 2.75         | 35.97        | 2.57       | 1.21         |
| Std-lib masking  | 23.53%     | 28.70%       | 75.40%       | 77.44%     | 6.98%        |
| Fraction masked  | 25.30%     | 29.61%       | 70.08%       | 75.05%     | 7.43%        |
| Run time (-t 20) | 42 min     | 2.08 h       | 94.88 h      | 24.8 h     | 10 min       |
| Sensitivity      | 91.70%     | 89.35%       | 91.10%       | 95.65%     | 91.17%       |
| Specificity      | 96.86%     | 91.26%       | 90.58%       | 95.66%     | 98.92%       |
| Accuracy         | 95.65%     | 90.70%       | 90.97%       | 95.65%     | 98.38%       |
| Precision        | 89.99%     | 81.18%       | 96.61%       | 98.69%     | 86.33%       |

322 \*Redundancy of the Arabidopsis library is not reduced since it is already very compact.

### 323 **Direct LTR library construction from PacBio reads**

324 The recent development of long-read sequencing technologies has provided a solution for  
325 resolving highly repetitive regions in *de novo* genome sequencing projects (VanBuren, et al. 2015).  
326 The PacBio single molecule, real-time (SMRT) sequencing technology produces long reads with an  
327 average length of 10-15kb. Empirically, more than 95% of LTR-RTs range from 1-15kb  
328 (**Supplementary Fig S1**). Thus, theoretically, the long-read sequencing technology may allow us to  
329 identify intact LTR elements directly from the reads.

330 It is known that the current PacBio RS II platform has an average sequencing error rate of 15%.  
331 In our experience, most LTR-RT insertions are structurally detectable if inserted 4 million years ago  
332 or younger (**Supplementary Fig S2**) which is equivalent to 89.6% of identity between two LTR

333 regions. When mutations/sequencing errors accumulated, the fine structure such as TSD and terminal  
334 motifs could be mutated and element would be beyond the detection limit. Thus the sequencing error  
335 rate of 15% could have artificially aged the actual LTR element to become undetectable. We tested  
336 the LTR\_retriever using raw PacBio reads and no confident intact LTR element was reported.  
337 However, LTR\_retriever performed excellently using self-corrected PacBio reads with an error rate of  
338 2%.

339 To test the efficiency of LTR\_retriever, we used 20 thousand (k) self-corrected PacBio reads  
340 from Arabidopsis *Ler-0* as an initial input (**Materials and Methods**), and with 20 k reads as an  
341 increment until 180 k. The Arabidopsis repeat library from Repbase was used to calculate sensitivity,  
342 specificity, accuracy, and precision. The LTR library constructed from the Arabidopsis *Ler-0* genome  
343 was used as the control to compare to the quality of LTR libraries constructed from PacBio reads. As  
344 more reads were used, the prediction of intact LTR-RTs increased linearly (**Fig 4A**). However, the  
345 size of LTR libraries constructed from these candidates are not increased at the same rate (**Fig 4A**),  
346 and the sensitivity exceeds the library developed from the genome sequence after 40 k reads input and  
347 is saturated at 93% after 120 k reads being used (**Fig 4B**). Since the average length of these reads is  
348 14.6kb, and the Arabidopsis “*Ler-0*” genome was assembled as ~131 MB, the sample of 40 k and 200  
349 k reads is equivalent to 4.5- and 13.4-fold genome coverage, respectively. Moreover, despite the  
350 number of reads being used, the average specificity, accuracy, and precision were 99.5%, 98.8%, and  
351 94.0%, respectively, indicating very high-quality LTR libraries could be constructed from PacBio  
352 reads. Furthermore, masking potentials (percentage of the genome that could be masked) of PacBio  
353 LTR libraries surpass the standard library level after using 40 k or more reads (**Supplementary Fig**  
354 **S3**), indicating that it is sufficient to construct a comprehensive library using as little as 4.5X PacBio  
355 self-corrected reads. To summarize, LTR\_retriever shows high sensitivity, specificity, accuracy, and  
356 precision to construct LTR libraries directly from self-corrected PacBio reads prior to genome  
357 assembly.

### 358 **Identification of LTR-RTs with non-canonical motifs**

359 LTR-RT features dinucleotide motifs flanking the direct repeat regions (**Fig 1**). The most  
360 common motif is the palindromic 5'-TG..CA-3' motif. However, during manual curation of LTR-RTs,  
361 we discovered many LTRs with non-TGCA motifs (Ferguson and Jiang, unpublished). These non-

362 canonical motifs can be non-palindromic, for example, *Tos17*, a rice LTR-RT that can be activated by  
363 tissue culture, has non-canonical motifs of 5'-TG...GA-3' (Hirochika, et al. 1996); *AtRE1* in  
364 Arabidopsis has 5'-TA...TA-3' motifs (Kuwahara, et al. 2000); and *TARE1*, intensively amplified in  
365 the tomato genome, has 5'-TA...CA-3' motifs (Yin, et al. 2013). In addition, three copies of *Gypsy*-  
366 like elements with 5'-TG..CT-3' motifs were annotated in the soybean genome (Du, et al. 2010).

367 To recover LTR elements with certain terminal motif, LTRharvest enables the “-motif”  
368 parameter allowing users to specify the motif to be discovered, which requires prior motif knowledge.  
369 When users apply the default setting (no motif specified), the number of LTR-RT candidates can be 2-  
370 4 times more than the result with “-motif TGCA” specified. The significant increase of predicted  
371 candidates does not necessarily indicate a large number of non-TGCA LTR recovered. With  
372 annotations and further curations, we found 99% of the additional candidates are false positives in the  
373 rice genome.

374 To identify non-TGCA LTR-RT with high confidence, we developed **Module 7** as an optional  
375 add-on to LTR\_retriever (**Supplementary Methods**). The sacred lotus genome carries many non-  
376 canonical LTR elements. We tested the performance of LTR\_retriever in identifying such elements  
377 using the manually curated non-canonical LTR-RTs from this genome (**Supplementary methods**).  
378 Our results showed that LTR\_retriever could identify high-quality non-canonical LTR-RTs, with a  
379 sensitivity of 74.7% and a precision of 81.6% (FDR=18.4%). And the specificity and accuracy were  
380 98.5% and 96.5%, respectively, indicating that the identified non-canonical LTR-RTs are highly  
381 accurate.

### 382 **Non-canonical LTR-RTs are widespread in plants and preferentially insert in genic regions**

383 To characterize non-TGCA LTR-RTs, we searched through 50 publically available plant  
384 genomes. A total of 870 high-confidence non-TGCA LTR-RTs were found from 42 of these genomes  
385 (**Materials and methods**). Further categorization of non-TGCA LTR-RTs identified seven types of  
386 high-confident non-canonical motifs including three (TACT, TGTA, and TCCA) that were not  
387 previously reported (**Supplementary Table S2**). Further classification of ORFs within these elements  
388 based on pHMM search indicated that 89% of classified non-TGCA LTR elements were the *Copia*  
389 type, while only 11% were the *Gypsy* type (**Supplementary Table S2**). We also identified 83,368  
390 canonical LTR-RTs in these genomes, with a *Gypsy* - *Copia* ratio of 2.9:1 (**Table 2**).

391

392 **Table 2.** Average element size of different types of LTR-RTs in 50 sequenced plant genomes.

|              | Non-TGCA LTR-RT |            |          |         |            | TGCA LTR-RT |            |          |         |            |
|--------------|-----------------|------------|----------|---------|------------|-------------|------------|----------|---------|------------|
|              | Count           | Percentage | LTR (bp) | IN (bp) | Total (bp) | Count       | Percentage | LTR (bp) | IN (bp) | Total (bp) |
| <i>Copia</i> | 255             | 29.2%      | 272      | 4435    | 4979       | 14854       | 17.8%      | 911      | 5765    | 7588       |
| <i>Gypsy</i> | 34              | 3.9%       | 1115     | 5044    | 7273       | 42667       | 51.2%      | 1288     | 7352    | 9928       |
| unknown      | 583             | 66.9%      | 233      | 4684    | 5151       | 25847       | 31.0%      | 1184     | 4656    | 7025       |
| All LTR      | 872             | 100%       | 279      | 4625    | 5184       | 83368       | 100%       | 1189     | 6234    | 8611       |

393

394 For canonical LTR-RTs, the length of the LTR region in *Gypsy* elements is about 40% longer  
 395 than *Copia* elements (**Table 2**). However, in the case of non-canonical LTR-RTs, this size difference  
 396 is intensified to 400%. This is due to the significant reduction of LTR length of non-canonical *Copia*  
 397 elements, from an average size of 911 bp to 272 bp (**Table 2**). The size of internal region and whole  
 398 element of non-canonical *Copia* are also much shorter than those of *Copia* elements carrying the  
 399 TGCA motif (**Table 2**). These results suggest that shorter LTRs may have facilitated the amplification  
 400 and survival of non-TGCA LTR-RTs.

401 Comparing to canonical *Copia* elements, less new insertions (5% less for elements younger than  
 402 0.2 MY) and more old elements (7% more of 1.2 MY – 1.8 MY elements) (**Fig 5A**) were observed for  
 403 non-canonical *Copia* elements based on sequence similarity between LTR sequences. Meanwhile, we  
 404 found that elements with canonical motifs were more likely to form solo LTRs. Comparing to 54% of  
 405 the non-canonical *Copia* elements have solo-complete LTR ratios less than three, only 32% of  
 406 canonical *Copia* elements are in this category, indicating the inefficient removal of non-canonical  
 407 LTR-RT insertions (**Fig 5B**). To characterize the insertion preference, we extracted 200 bp flanking  
 408 sequences of each element, and BLAST against the genome for determination of copy numbers. The  
 409 majority (70%) of the flanking sequences of non-canonical *Copia* elements have copy numbers less  
 410 than five, while that of canonical *Copia* elements is 46% (**Fig 5C**). Strikingly, 40% of non-TGCA  
 411 *Copia* elements are located within 1KB distance to protein-coding genes, which is 16% more frequent  
 412 than canonical *Copia* elements (**Fig 5D**). Taking together, our results show that non-canonical *Copia*  
 413 elements prefer non-repetitive genomic regions and are often inserted within or close to genes.

## 414 **DISCUSSION**

415 Technological advances have minimized the cost of sequencing a genome. The real bottleneck to  
416 establishing genomic resources of an organism is the annotation of its genomic sequence. As  
417 mentioned above, TEs, particularly LTR retrotransposons, are the largest component of most plant  
418 genomes. If TEs are left unmasked prior to gene annotation, they would seed numerous of spurious  
419 sequence alignments, producing false evidence for gene identification. Even worse, the open reading  
420 frames of TEs look like *bonafide* genes to most gene-prediction software, corrupting the final  
421 annotations. As a result, the first step of genome annotation is to identify TEs and other repeats.

422 Subsequently, these repeats are masked to facilitate gene annotation. As a result, the quality of repeat  
423 library is not only important for the study of repeats, but also critical for high-quality gene prediction.

424 In this study, we reported the development of LTR\_retriever, a multithreading empowered Perl  
425 program that can process LTR-RT candidates from LTR\_finder, LTRharvest, and MGEScan-LTR and  
426 generate high-quality and compact LTR libraries for genome annotations or study of transposable  
427 elements. We curated LTR elements identified from the rice genome and used the curated LTR library  
428 as the standard to test the performance of LTR\_retriever in terms of sensitivity, specificity, accuracy,  
429 and precision. Benchmark tests on existing programs indicated very high sensitivities achieved,  
430 however, specificities and accuracies were not satisfactory, and the FDR could be as high as 49%,  
431 suggesting the necessity for improvement (**Supplementary Table S1**).

432 Since annotation of TE sequences usually precedes the annotation of functional genes for a newly  
433 sequenced genome, propagation of false positives in the construction of LTR library will significantly  
434 increase the probability of misidentification of LTR sequences in the genome and further dampen the  
435 power of downstream annotations. For example, it is known that most DNA transposons target genic  
436 regions and avoid repetitive sequences (Feschotte and Pritham 2007; Han, et al. 2013). As a result, it  
437 is not uncommon that the sequence between two adjacent DNA transposons represents gene coding  
438 regions or regulatory sequences. If the two DNA transposons are mistakenly annotated as the LTR of  
439 an individual LTR-RT, the intervening genes would be considered as the internal region of an LTR-  
440 RT and would be masked before gene annotation. In this scenario, the false positives could be  
441 extremely detrimental for downstream analyses. LTR\_retriever effectively eliminates such false  
442 positives. By processing LTR-RT candidates using LTR\_retriever, the specificity and accuracy



443 reached to 96.9% and 95.7%, respectively, and the FDR is reduced to 10% which is among the lowest  
444 of all existing methods (**Fig 3, Supplementary Table S1**). Strikingly, the sensitivity of LTR\_retriever  
445 remained as high as 91.7%, meaning that we only sacrificed less than 2% of sensitivity to achieve all  
446 these performance improvements (**Fig 3, Supplementary Table S1**). Further benchmark tests on two  
447 maize genomes, the sacred lotus genome, and the Arabidopsis genome also showed excellent  
448 performance (**Table 1**), suggesting that LTR\_retriever is compatible with both monocot and dicot  
449 genomes.

450 The majority of LTR-RTs we identified carried a palindromic dinucleotide motif flanking each  
451 direct repeat. The motif is well conserved and is usually 5'-TG..CA-3'. However, the importance of  
452 such conservation is poorly understood. Retrovirus, e.g., HIV-1, is thought to be the close relative of  
453 LTR elements with the addition of an envelope protein (Zhou, et al. 2001; Hobaika, et al. 2009).  
454 Studies of retrovirus integration indicated that the terminal sequences of retroviral LTR regions,  
455 especially the 3' CA ends, are essential and important for integration of the virus (Zhou, et al. 2001;  
456 Hobaika, et al. 2009). As a result, there might be a convergent evolution between the termini of the  
457 elements and transposition machinery. That may explain why most LTR elements have the conserved  
458 TG..CA motif.

459 Despite the conservation, non-TGCA motifs were also found but in a much lower frequency.  
460 LTR\_retriever also demonstrated high performance in identifying such non-canonical LTR-RTs. A  
461 broad scan on 50 published plant genomes retrieved seven non-TGCA type LTR-RTs with the  
462 majority belonging to the *Copia* family (**Supplementary Table S2**). For some, the abundance is not  
463 ignorable. It appears that, among the four terminal nucleotides (TGCA), only the first nucleotide (T)  
464 is invariable. Our systemic survey for the presence of non-canonical termini provides guidance for  
465 future annotation of LTR elements.

466 Previous studies indicate that *Gypsy* and *Copia* elements are differentially located in plant  
467 genomes. The distribution of *Copia* elements is biased toward euchromatic chromosomal arms that  
468 are relatively close to genes, whereas *Gypsy* elements are more likely located in the gene poor,  
469 heterochromatic or pericentromeric regions (Baucom, et al. 2009; Bousios, et al. 2012). Here we  
470 demonstrate, the non-canonical *Copia* elements are even closer to genes than canonical *Copia*  
471 elements and preferentially insert into non-repetitive sequences (**Fig. 4**). Apparently, there is a

472 negative correlation between distance to genes and elements size, particularly the size of LTRs. As a  
473 result, the limited amplification and smaller size are likely the consequences of the target specificity  
474 of non-canonical LTR elements.

475 In Arabidopsis, TEs are separated into two classes based on their location (Sigman and Slotkin  
476 2016). One class is present in large constitutive heterochromatic regions and their CHH methylation is  
477 maintained by chromomethylase 2 (CMT2), and the other class is located near genes where CHH  
478 methylation is constantly targeted by RNA-directed DNA methylation (RdDM). TEs in genic regions  
479 are subject to more stringent epigenetic control and demonstrate a higher level of CHH methylation  
480 compared to TEs in the non-genic region (Gent, et al. 2013; Li, et al. 2015). Moreover, TE insertions  
481 in genic regions are less likely to spread in the population since some of them are deleterious. In  
482 addition, genic space in a genome is limited comparing to the non-genic sequence space. The  
483 combined effect of epigenetic control, negative selection, and limited target sites is attributed to the  
484 low abundance of non-canonical LTR elements. Furthermore, selection against insertion of large size  
485 TEs would result in the relatively small size of both LTR and internal region of these elements. To  
486 this notion, the *Tos17* element in rice (with a “TG..GA” terminal motif) is an excellent example. The  
487 length of the *Tos17* element is only 4.3 kb with an LTR of 138 bp, which is very small compared to  
488 other autonomous LTR elements (**Table 2**). It preferentially inserts into genic regions and may  
489 amplify rapidly during tissue culture (Miyao, et al. 2003). Nevertheless, there are only a few copies of  
490 *Tos17* in the natural population of rice (Hirochika, et al. 1996), suggesting the selective pressure  
491 against insertion of this element (Hirochika, et al. 1996; Miyao, et al. 2003). Because of its insertion  
492 preference, *Tos17* has been applied as a tool for mutagenesis (Miyao, et al. 2003). In our study, we  
493 identified 870 high-confidence non-canonical LTRs in 42 out of 50 plant genomes, which is likely an  
494 underestimate due to high stringency. These elements also prefer genic insertions, which could  
495 contain other *Tos17-like* active elements in these species. In conclusion, annotation of non-canonical  
496 LTR elements is important not only due to their prevalent distribution, but also the potential  
497 application in functional studies in plants.

498 The recent development of single molecule sequencing technology enables the assembly of low  
499 complexity and repetitive regions. Many genome sequencing projects have benefited from the PacBio  
500 SMRT sequencing technique which features with 10-15kb average read length (Ming, et al. 2015;

501 VanBuren, et al. 2015). Given the length of most LTR elements is less than 15kb (**Supplementary**  
502 **Fig S1**), it is possible to identify full-length LTRs from PacBio long reads. We applied LTR\_retriever  
503 on self-corrected PacBio reads which proved a successful strategy to identify LTR-RTs. For the  
504 Arabidopsis “Ler-0” genome, 40 thousand self-corrected reads covering approximately 4.5X of the  
505 genome were more than sufficient to generate an LTR library with higher quality compared to that  
506 generated from the assembled genome (**Fig 4**). Although self-corrected reads still have ~2%  
507 sequencing error rate, the generated LTR library was proven highly sensitive and accurate (**Fig 4**).  
508 The pre-identified full-length LTRs may help to estimate LTR percentages of the new genome, study  
509 the evolution of LTR-RTs without performing the computationally intensive whole genome assembly,  
510 and facilitate downstream *de novo* gene annotation. Since LTR-RTs contribute greatly to the size of  
511 plant genomes, identification and masking of repetitive sequences in advance could speed up the  
512 genome assembly by as much as 50-fold (Gregory Concepcion, Pacific Bioscience, personal  
513 communication).

514 In summary, we developed a package which takes genome sequences or corrected PacBio reads  
515 as input and generates high-quality, non-redundant libraries for LTR elements. It also provides  
516 information about the insertion time and location of intact LTR elements in the genome. This tool  
517 demonstrates significant improvements in specificity, accuracy, and precision while maintaining the  
518 high sensitivity compared to existing methods. As a result, it will facilitate future genome assembly  
519 and annotation as well as enable rapid comparative studies of LTR-RT dynamics in multiple genomes.

## 520 **MATERIALS AND METHODS**

### 521 **Implementation of LTR\_retriever**

522 LTR\_retriever is a command line program developed based on Perl. The package supports multi-  
523 threading, which was achieved using the Semaphore module in Perl, and multithreading requests are  
524 passed to dependent packages. LTR\_retriever takes genomic sequences in the FASTA format as input.  
525 The program can handle fragmented and gapped regions, which is a benefit when annotating draft  
526 genomes. LTR\_retriever has been optimized for plant genomes; however, its parameters can be  
527 adjusted for the genomes of other organisms. The output of the program contains a set of high-quality,  
528 comprehensive but non-redundant LTR exemplars (library), which can be used to identify or mask  
529 LTR sequences using RepeatMasker. Additionally, a summary table that includes LTR-RT

530 coordinates, length, TSDs, motifs, insertion time, and LTR families is produced. The program also  
531 provides gff3 format output, which is convenient for downstream analysis.

### 532 **Genomes and sequences**

533 The initial BAC sequences of “Nipponbare” were downloaded from the Rice Genome Research  
534 Program (<http://rgp.dna.affrc.go.jp>) for our early efforts to construct the rice TE library. The rice  
535 reference genome “Nipponbare” release 7 was downloaded from the MSU Rice Genome Annotation  
536 Project (<http://rice.plantbiology.msu.edu>) (Kawahara, et al. 2013). The sacred lotus genome was  
537 downloaded from the National Center for Biotechnology Information (NCBI) under the project ID  
538 “AQOG01”. The Arabidopsis reference genome “Columbia” version 10 was downloaded from The  
539 Arabidopsis Information Resource (TAIR) ([www.arabidopsis.org](http://www.arabidopsis.org)) (Berardini, et al. 2015). The maize  
540 genome “B73” version AGPv4 was downloaded from Ensembl Plants release 34. An additional of 46  
541 plant genomes were downloaded from Phytozome v11 (Goodstein, et al. 2012) (**Supplementary**  
542 **Methods**).

543 The Arabidopsis “Ler-0” genome was sequenced and assembled by Pacific Biosciences using the  
544 PacBio RS II platform and the P5-C3 chemistry. The assembly is about 131 MB with a contig N50  
545 6.36 MB (<https://github.com/PacificBiosciences/DevNet>). A total of 184,318 self-corrected reads  
546 were also downloaded, which is about 2.69 GB with an average read length of 14.6kb and sequence  
547 error rate < 2%, covering 20.58 X coverage of the genome.

### 548 **Standard LTR libraries**

549 In this study, LTR libraries from four genomes (rice, maize, Arabidopsis, and sacred lotus) were  
550 used to evaluate the performance of LTR\_retriever as well as existing tools. The TE database of maize  
551 was downloaded from the Maize TE database (<http://maizetedb.org>). The Arabidopsis repeat library  
552 athrep.ref was downloaded from Repbase (Jurka 2000). The LTR libraries for rice and sacred lotus  
553 were manually curated in the Jiang Lab (**Supplementary Methods, Supplementary sequence files**).

### 554 **Benchmark programs and parameters**

555 LTR\_STRUC (McCarthy and McDonald 2003) was obtained from Mr. Vinay Mittal  
556 ([vinaykmittal@gatech.edu](mailto:vinaykmittal@gatech.edu)) via personal communications. No parameter settings were available for  
557 LTR\_STRUC. LTRharvest (Ellinghaus, et al. 2008) is part of the GenomeTools v1.5.4 (Gremme, et al.  
558 2013). Parameters for running LTRharvest were empirically optimized with “-minlenltr 100 -

559 *maxlenltr 7000 -mintsd 4 -maxtsd 6 -motif TGCA -motifmis 0 -similar 90 -vic 10 -seed 20*". Optimized  
560 parameters were also applied to MGEScan-LTR (Rho, et al. 2007) and LTR\_finder (Xu and Wang  
561 2007). The modified version of MGEScan-LTR was obtained from the DAWG-PAWS package (Estill  
562 and Bennetzen 2009) and was run with parameter settings "*-min-mem=20 -mim-dist=1000 -max-*  
563 *dist=15000 -min-ltr=50 -max-ltr=7000 -min-orf=200*". LTR\_finder v1.0.6 was run with parameter  
564 settings "*-D 15000 -d 1000 -L 7000 -l 100 -p 20 -M 0.9*". To tolerate sequencing errors on corrected  
565 PacBio reads, parameters "*-motif TGCA -motifmis 1*" were used in related LTRharvest runs. To  
566 identify extra non-canonical LTR-RTs, no "*-motif*" parameter was specified for the maximum  
567 sensitivity.

568 Based on the annotation using the standard LTR library, the whole genome was categorized into  
569 four parts which are true positive (TP, LTR was identified), false negative (FN, LTR was not  
570 identified), false positive (FP, non-LTR was identified as LTR), and true negative (TN, non-LTR was  
571 not identified as LTR). Four metrics were used to evaluate the performance of LTR\_retriever and its  
572 counterparts, which are sensitivity, specificity, accuracy, and precision defined as follows.

573 **Sensitivity = TP/(TP+FN)**

574 **Specificity = TN/(FP+TN)**

575 **Accuracy = (TP+TN)/(TP+TN+FP+FN)**

576 **Precision = TP/(TP+FP)**

577 Sensitivity, specificity, accuracy, and precision of each test were calculated using genomic  
578 sequence lengths by custom Perl scripts.

579

## 580 **DATA ACCESS**

581 LTR\_retriever is an open source software available in the GitHub repository

582 ([https://github.com/oushujun/LTR\\_retriever](https://github.com/oushujun/LTR_retriever)). Manually curated LTR libraries for rice and sacred lotus

583 are available as supplementary files.

584

## 585 **FUNDING**

586 This work was supported by the National Science Foundation [MCB-1121650 and IOS-1126998 to  
587 N.J.]; and the United States Department of Agriculture National Institute of Food and Agriculture and  
588 AgBioResearch at Michigan State University (Hatch grant MICL02120 to N.J.).

589

## 590 **ACKNOWLEDGMENTS**

591 We thank Dr. Yi Liao (Institute of Genetics and Developmental Biology, Chinese Academy of  
592 Sciences) for valuable discussions. We thank Stefan Cerbin, Drs. Cornelius Barry, Rebecca Grumet,  
593 Steve van Nocker, and Wayne Loescher for critical reading of the manuscript.

594

## 595 **REFERENCE**

596 Ammiraju JS, Zuccolo A, Yu Y, Song X, Piegu B, Chevalier F, Walling JG, Ma J, Talag J, Brar DS, et  
597 al. 2007. Evolutionary dynamics of an ancient retrotransposon family provides insights into evolution  
598 of genome size in the genus *Oryza*. *Plant J* 52:342-351.

599 Ammiraju JSS, Fan C, Yu Y, Song X, Cranston KA, Pontaroli AC, Lu F, Sanyal A, Jiang N, Rambo T,  
600 et al. 2010. Spatio-temporal patterns of genome evolution in allotetraploid species of the genus *Oryza*.  
601 *The Plant Journal* 63:430-442.

602 Arabidopsis Genome Initiative. 2000. Analysis of the genome sequence of the flowering plant  
603 *Arabidopsis thaliana*. *Nature* 408:796-815.

604 Baucom RS, Estill JC, Chaparro C, Upshaw N, Jogi A, Deragon J-M, Westerman RP, SanMiguel PJ,  
605 Bennetzen JL. 2009. Exceptional Diversity, Non-Random Distribution, and Rapid Evolution of  
606 Retroelements in the B73 Maize Genome. *PLoS Genet* 5:e1000732.

607 Benson G. 1999. Tandem repeats finder: a program to analyze DNA sequences. *Nucleic Acids Res*  
608 *27*:573-580.

609 Berardini TZ, Reiser L, Li D, Mezheritsky Y, Muller R, Strait E, Huala E. 2015. The Arabidopsis  
610 information resource: Making and mining the “gold standard” annotated reference plant genome.  
611 *genus* 53:474-485.

612 Bergman C, Quesneville H, Anxolabehere D, Ashburner M. 2006. Recurrent insertion and duplication  
613 generate networks of transposable element sequences in the *Drosophila melanogaster* genome.  
614 *Genome Biol* 7:R112.

- 615 Bousios A, Kourmpetis YAI, Pavlidis P, Minga E, Tsaftaris A, Darzentas N. 2012. The turbulent life of  
616 Sirevirus retrotransposons and the evolution of the maize genome: more than ten thousand elements  
617 tell the story. *The Plant Journal* 69:475-488.
- 618 Chaparro C, Guyot R, Zuccolo A, Piégu B, Panaud O. 2007. RetrOryza: a database of the rice LTR-  
619 retrotransposons. *Nucleic Acids Res* 35:D66-D70.
- 620 Du J, Tian Z, Bowen NJ, Schmutz J, Shoemaker RC, Ma J. 2010. Bifurcation and enhancement of  
621 autonomous-nonautonomous retrotransposon partnership through LTR swapping in soybean. *Plant*  
622 *Cell* 22:48-61.
- 623 Ellinghaus D, Kurtz S, Willhoeft U. 2008. LTRharvest, an efficient and flexible software for *de novo*  
624 detection of LTR retrotransposons. *BMC Bioinformatics* 9:18.
- 625 Estill JC, Bennetzen JL. 2009. The DAWGPAWS pipeline for the annotation of genes and  
626 transposable elements in plant genomes. *Plant Methods* 5:1-11.
- 627 Fawcett T. 2006. An introduction to ROC analysis. *Pattern Recognition Letters* 27:861-874.
- 628 Fedoroff NV. 2012. Transposable elements, epigenetics, and genome evolution. *Science* 338:758-767.
- 629 Feschotte C, Pritham EJ. 2007. DNA transposons and the evolution of eukaryotic genomes. *Annu Rev*  
630 *Genet* 41:331-368.
- 631 Gao D, Chen J, Chen M, Meyers BC, Jackson S. 2012. A highly conserved, small LTR  
632 retrotransposon that preferentially targets genes in grass genomes. *PLoS One* 7:e32010.
- 633 Gent JI, Ellis NA, Guo L, Harkess AE, Yao Y, Zhang X, Dawe RK. 2013. CHH islands: *de novo* DNA  
634 methylation in near-gene chromatin regulation in maize. *Genome Res* 23:628-637.
- 635 Goodstein DM, Shu S, Howson R, Neupane R, Hayes RD, Fazo J, Mitros T, Dirks W, Hellsten U,  
636 Putnam N, et al. 2012. Phytozome: a comparative platform for green plant genomics. *Nucleic Acids*  
637 *Res* 40:D1178-D1186.
- 638 Gremme G, Steinbiss S, Kurtz S. 2013. GenomeTools: A comprehensive software library for efficient  
639 processing of structured genome annotations. *IEEE/ACM Trans Comput Biol Bioinform* 10:645-656.
- 640 Han JS. 2010. Non-long terminal repeat (non-LTR) retrotransposons: mechanisms, recent  
641 developments, and unanswered questions. *Mob DNA* 1:15-15.
- 642 Han Y, Qin S, Wessler SR. (Han2013 co-authors). 2013. Comparison of class 2 transposable elements  
643 at superfamily resolution reveals conserved and distinct features in cereal grass genomes. *BMC*

- 644 Genomics 14:1-10.
- 645 Havecker ER, Gao X, Voytas DF. 2004. The diversity of LTR retrotransposons. *Genome Biol* 5:225.
- 646 Hirochika H, Sugimoto K, Otsuki Y, Tsugawa H, Kanda M. 1996. Retrotransposons of rice involved  
647 in mutations induced by tissue culture. *Proc Natl Acad Sci U S A* 93:7783-7788.
- 648 Hobaika Z, Zargarian L, Boulard Y, Maroun RG, Mauffret O, Fermandjian S. 2009. Specificity of  
649 LTR DNA recognition by a peptide mimicking the HIV-1 integrase  $\alpha 4$  helix. *Nucleic Acids Res*  
650 37:7691-7700.
- 651 Hoen DR, Hickey G, Bourque G, Casacuberta J, Cordaux R, Feschotte C, Fiston-Lavier A-S, Hua-Van  
652 A, Hubley R, Kapusta A, et al. 2015. A call for benchmarking transposable element annotation  
653 methods. *Mob DNA* 6:13.
- 654 Hollister JD, Gaut BS. 2009. Epigenetic silencing of transposable elements: A trade-off between  
655 reduced transposition and deleterious effects on neighboring gene expression. *Genome Res* 19:1419-  
656 1428.
- 657 Hollister JD, Smith LM, Guo Y-L, Ott F, Weigel D, Gaut BS. 2011. Transposable elements and small  
658 RNAs contribute to gene expression divergence between *Arabidopsis thaliana* and *Arabidopsis lyrata*.  
659 *Proc Natl Acad Sci U S A* 108:2322-2327.
- 660 International Rice Genome Sequencing Project. 2005. The map-based sequence of the rice genome.  
661 *Nature* 436:793-800.
- 662 Jiang N. 2016. Plant Transposable Elements. In. eLS: John Wiley & Sons, Ltd.
- 663 Jiao Y, Peluso P, Shi J, Liang T, Stitzer MC, Wang B, Campbell MS, Stein JC, Wei X, Chin C-S, et al.  
664 2017. Improved maize reference genome with single-molecule technologies. *Nature advance online*  
665 *publication*.
- 666 Jukes TH, Cantor CR. 1969. Evolution of Protein Molecules. In: MUNRO HN, editor. *Mammalian*  
667 *Protein Metabolism*: Academic Press. p. 21-132.
- 668 Jurka J. 2000. Repbase update: a database and an electronic journal of repetitive elements. *Trends in*  
669 *Genetics* 16:418-420.
- 670 Kawahara Y, de la Bastide M, Hamilton J, Kanamori H, McCombie W, Ouyang S, Schwartz D,  
671 Tanaka T, Wu J, Zhou S, et al. 2013. Improvement of the *Oryza sativa* Nipponbare reference genome  
672 using next generation sequence and optical map data. *Rice* 6:1-10.



- 673 Kumar A, Bennetzen JL. 1999. Plant retrotransposons. *Annu Rev Genet* 33:479-532.
- 674 Kuwahara A, Kato A, Komeda Y. 2000. Isolation and characterization of *copia*-type retrotransposons  
675 in *Arabidopsis thaliana*. *Gene* 244:127-136.
- 676 Lee H, Lee M, Mohammed Ismail W, Rho M, Fox GC, Oh S, Tang H. 2016. MGEScan: a Galaxy-  
677 based system for identifying retrotransposons in genomes. *Bioinformatics*.
- 678 Lerat E. 2010. Identifying repeats and transposable elements in sequenced genomes: how to find your  
679 way through the dense forest of programs. *Heredity (Edinb)* 104:520-533.
- 680 Levy A, Schwartz S, Ast G. 2010. Large-scale discovery of insertion hotspots and preferential  
681 integration sites of human transposed elements. *Nucleic Acids Res* 38:1515-1530.
- 682 Li Q, Gent JI, Zynda G, Song J, Makarevitch I, Hirsch CD, Hirsch CN, Dawe RK, Madzima TF,  
683 McGinnis KM, et al. 2015. RNA-directed DNA methylation enforces boundaries between  
684 heterochromatin and euchromatin in the maize genome. *Proc Natl Acad Sci U S A* 112:14728-14733.
- 685 Ma J, Bennetzen JL. 2004. Rapid recent growth and divergence of rice nuclear genomes. *Proc Natl*  
686 *Acad Sci U S A* 101:12404-12410.
- 687 Ma J, Devos KM, Bennetzen JL. 2004. Analyses of LTR-retrotransposon structures reveal recent and  
688 rapid genomic DNA loss in rice. *Genome Res* 14:860-869.
- 689 Makarevitch I, Waters AJ, West PT, Stitzer MC, Hirsch CN, Ross-Ibarra J, Springer NM. 2015.  
690 Transposable elements contribute to activation of maize genes in response to abiotic stress. *PLoS*  
691 *Genet* 11:e1004915.
- 692 McCarthy EM, McDonald JF. 2003. LTR\_STRUC: a novel search and identification program for LTR  
693 retrotransposons. *Bioinformatics* 19:362-367.
- 694 Ming R, VanBuren R, Liu Y, Yang M, Han Y, Li L-T, Zhang Q, Kim M-J, Schatz M, Campbell M, et  
695 al. 2013. Genome of the long-living sacred lotus (*Nelumbo nucifera* Gaertn.). *Genome Biol* 14:R41.
- 696 Ming R, VanBuren R, Wai CM, Tang H, Schatz MC, Bowers JE, Lyons E, Wang M-L, Chen J,  
697 Biggers E, et al. 2015. The pineapple genome and the evolution of CAM photosynthesis. *Nat Genet*  
698 47:1435-1442.
- 699 Miyao A, Tanaka K, Murata K, Sawaki H, Takeda S, Abe K, Shinozuka Y, Onosato K, Hirochika H.  
700 2003. Target site specificity of the *Tos17* retrotransposon shows a preference for insertion within  
701 genes and against insertion in retrotransposon-rich regions of the genome. *The Plant Cell Online*

702 15:1771-1780.

703 Nystedt B, Street NR, Wetterbom A, Zuccolo A, Lin Y-C, Scofield DG, Vezzi F, Delhomme N,  
704 Giacomello S, Alexeyenko A, et al. 2013. The Norway spruce genome sequence and conifer genome  
705 evolution. *Nature* 497:579-584.

706 Piegu B, Guyot R, Picault N, Roulin A, Saniyal A, Kim H, Collura K, Brar DS, Jackson S, Wing RA,  
707 et al. 2006. Doubling genome size without polyploidization: Dynamics of retrotransposition-driven  
708 genomic expansions in *Oryza australiensis*, a wild relative of rice. *Genome Res* 16:1262-1269.

709 Rensing SA, Lang D, Zimmer AD, Terry A, Salamov A, Shapiro H, Nishiyama T, Perroud P-F,  
710 Lindquist EA, Kamisugi Y, et al. 2008. The *Physcomitrella* genome reveals evolutionary insights into  
711 the conquest of land by plants. *Science* 319:64-69.

712 Rho M, Choi J-H, Kim S, Lynch M, Tang H. 2007. *De novo* identification of LTR retrotransposons in  
713 eukaryotic genomes. *BMC Genomics* 8:90.

714 SanMiguel P, Gaut BS, Tikhonov A, Nakajima Y, Bennetzen JL. 1998. The paleontology of intergene  
715 retrotransposons of maize. *Nat Genet* 20:43-45.

716 SanMiguel P, Tikhonov A, Jin Y-K, Motchoulskaia N, et al. 1996. Nested retrotransposons in the  
717 intergenic regions of the maize genome. *Science* 274:765-768.

718 Schnable PS, Ware D, Fulton RS, Stein JC, Wei F, Pasternak S, Liang C, Zhang J, Fulton L, Graves  
719 TA, et al. 2009. The B73 maize genome: complexity, diversity, and dynamics. *Science* 326:1112-1115.

720 Sigman MJ, Slotkin RK. 2016. The First Rule of Plant Transposable Element Silencing: Location,  
721 Location, Location. *Plant Cell* 28:304-313.

722 Tian Z, Rizzon C, Du J, Zhu L, Bennetzen JL, Jackson SA, Gaut BS, Ma J. 2009. Do genetic  
723 recombination and gene density shape the pattern of DNA elimination in rice long terminal repeat  
724 retrotransposons? *Genome Res* 19:2221-2230.

725 VanBuren R, Bryant D, Edger PP, Tang H, Burgess D, Challabathula D, Spittle K, Hall R, Gu J, Lyons  
726 E, et al. 2015. Single-molecule sequencing of the desiccation-tolerant grass *Oropetium thomaeum*.  
727 *Nature* 527:508-511.

728 vonHoldt BM, Takuno S, Gaut BS. 2012. Recent retrotransposon insertions are methylated and  
729 phylogenetically clustered in *japonica* rice (*Oryza sativa* ssp. *japonica*). *Mol Biol Evol* 29:3193-3203.

730 Wessler SR. 2006. Transposable elements and the evolution of eukaryotic genomes. *Proc Natl Acad*

731 Sci U S A 103:17600-17601.

732 Wicker T, Sabot F, Hua-Van A, Bennetzen JL, Capy P, Chalhoub B, Flavell A, Leroy P, Morgante M,  
733 Panaud O, et al. 2007. A unified classification system for eukaryotic transposable elements. Nat Rev  
734 Genet 8:973-982.

735 Xin M, Yang R, Li G, Chen H, Laurie J, Ma C, Wang D, Yao Y, Larkins BA, Sun Q, et al. 2013.  
736 Dynamic expression of imprinted genes associates with maternally controlled nutrient allocation  
737 during maize endosperm development. Plant Cell 25:3212-3227.

738 Xu Z, Wang H. 2007. LTR\_FINDER: an efficient tool for the prediction of full-length LTR  
739 retrotransposons. Nucleic Acids Res 35:W265-268.

740 Yin H, Liu J, Xu Y, Liu X, Zhang S, Ma J, Du J. 2013. *TARE1*, a mutated *Copia*-like LTR  
741 retrotransposon followed by recent massive amplification in tomato. PLoS One 8:e68587.

742 You FM, Cloutier S, Shan Y, Ragupathy R. 2015. LTR Annotator: Automated identification and  
743 annotation of LTR retrotransposons in plant genomes. International Journal of Bioscience,  
744 Biochemistry and Bioinformatics 5:165-174.

745 Zhao D, Ferguson AA, Jiang N. 2016. What makes up plant genomes: The vanishing line between  
746 transposable elements and genes. Biochim Biophys Acta 1859:366-380.

747 Zhou H, Rainey GJ, Wong S-K, Coffin JM. 2001. Substrate sequence selection by retroviral integrase.  
748 J Virol 75:1359-1370.

749 Zhu W, Nancy Z, Ning W editors. NorthEast SAS Users Group. 2010 Baltimore, Maryland.

750

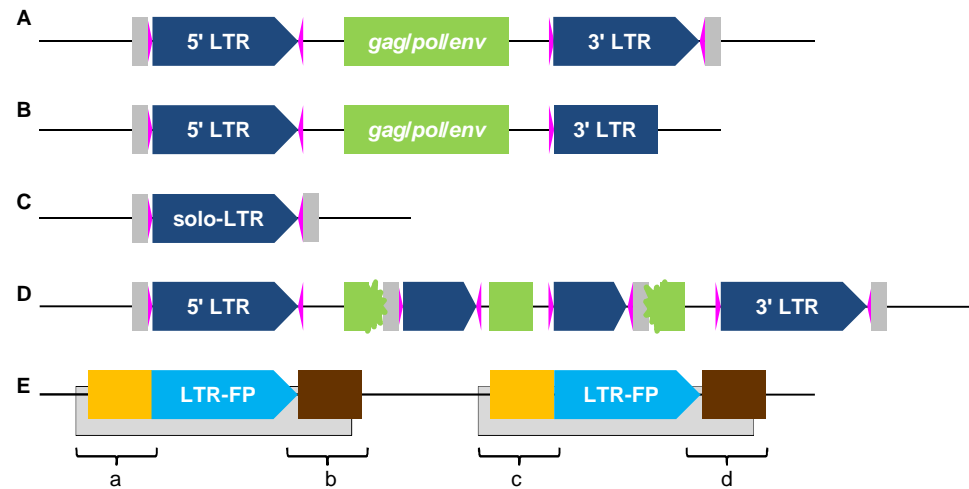

**Fig 1. The structure of LTR retrotransposons (LTR-RT), their derivatives, and false positives.**

(A) The structure of an intact LTR-RT with long terminal repeat (LTR) (navy pentagons), a pair of di-nucleotide palindromic motifs flanking each LTR (magenta triangles), the internal region including protein coding sequences for *gag*, *pol*, and *env* (green boxes), and 5 bp target site duplication (TSD) flanking the element (gray boxes). (B) A truncated LTR-RT with missing structural components. (C) A solo-LTR. (D) A nested LTR-RT with another LTR-RT inserted into its coding region. (E) A false LTR-RT detected due to two adjacent non-LTR repeats (gray boxes). The counterfeit also features with a direct repeat (blue pentagons) but usually has extended sequence similarity on one or both sides of the LTR (orange and brown boxes). Regions a-d are extracted and analyzed by LTR\_retriever.

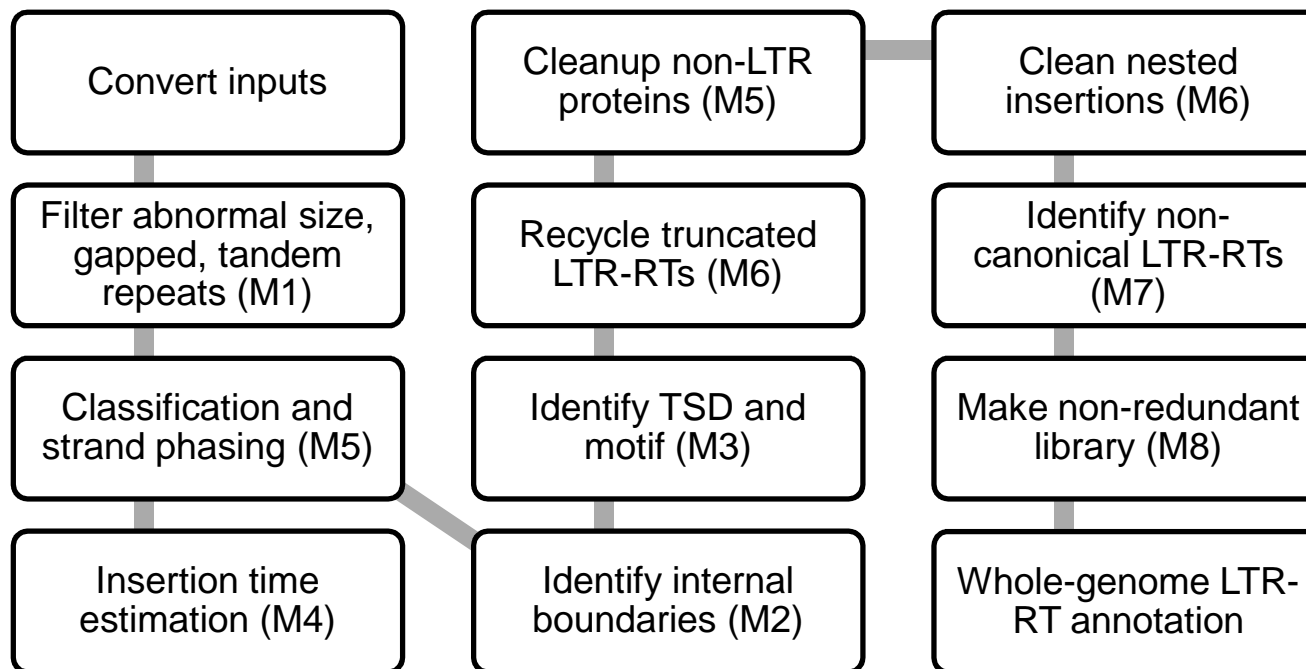

**Fig 2. Workflow of LTR\_retriever. Modules 1-8 are indicated in parentheses.**

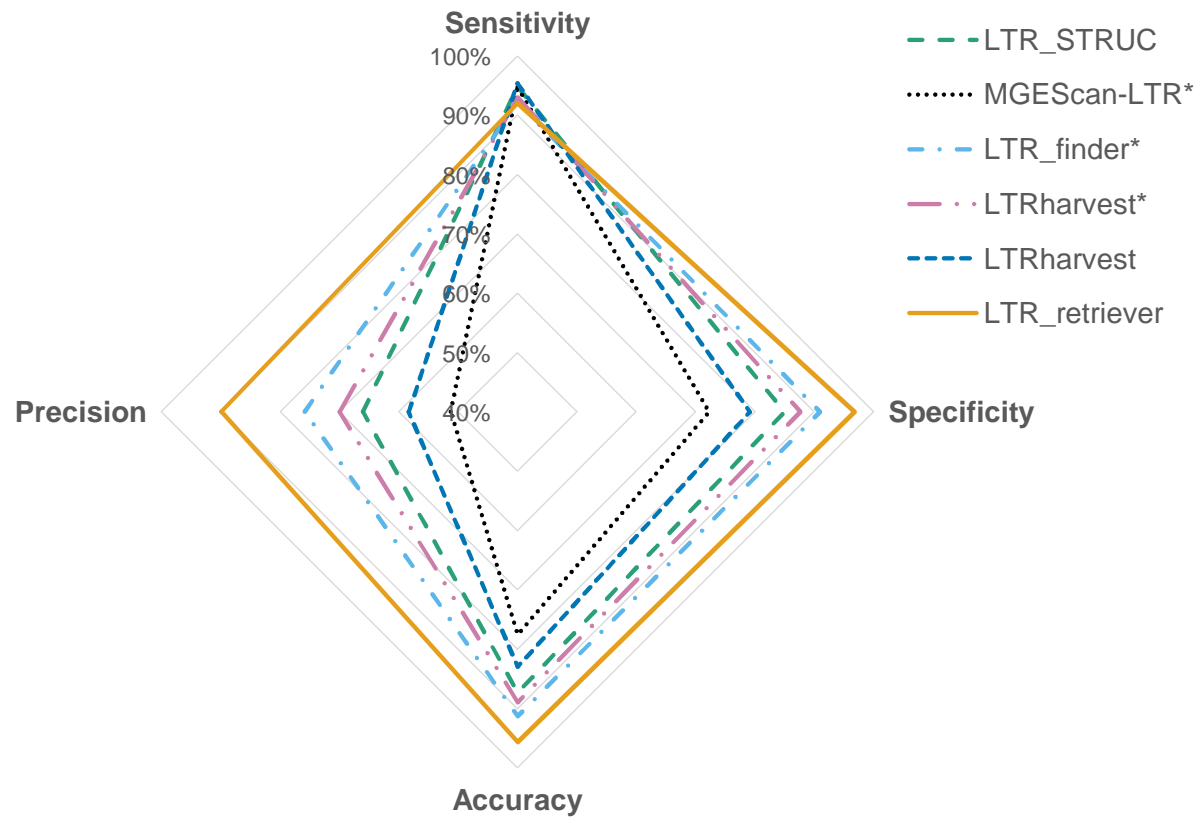

**Fig 3. Comparison of the performance of LTR-RT recovery programs on the rice genome.**

LTR libraries of the rice genome were constructed using LTR\_STRUC, MGEScan-LTR, LTR\_finder, LTRharvest, and LTR\_retriever, respectively, and then were used to identify LTR sequences in the genome using RepeatMasker. Identified candidate sequences were compared to whole-genome LTR sequences recognized by the manually curated standard library. The genomic size (bp) of true positive, false positive, true negative, and false negative were used to calculate sensitivity, specificity, accuracy, and precision. \*Indicates the analysis were using optimized parameters (**Materials and Methods**) while the remainder was in default parameters.

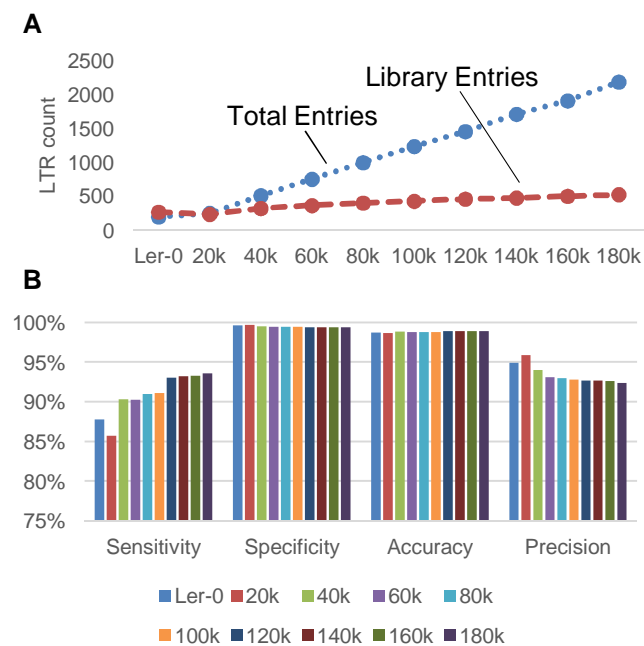

**Fig 4. Direct library construction using self-corrected PacBio reads.**

**(A)** Identification of intact LTR elements and construction of libraries using the Arabidopsis “Ler-0” genome and 20k - 180k self-corrected PacBio reads. **(B)** The performance of custom LTR libraries compared with that from the Arabidopsis reference (*Col-0*) genome.

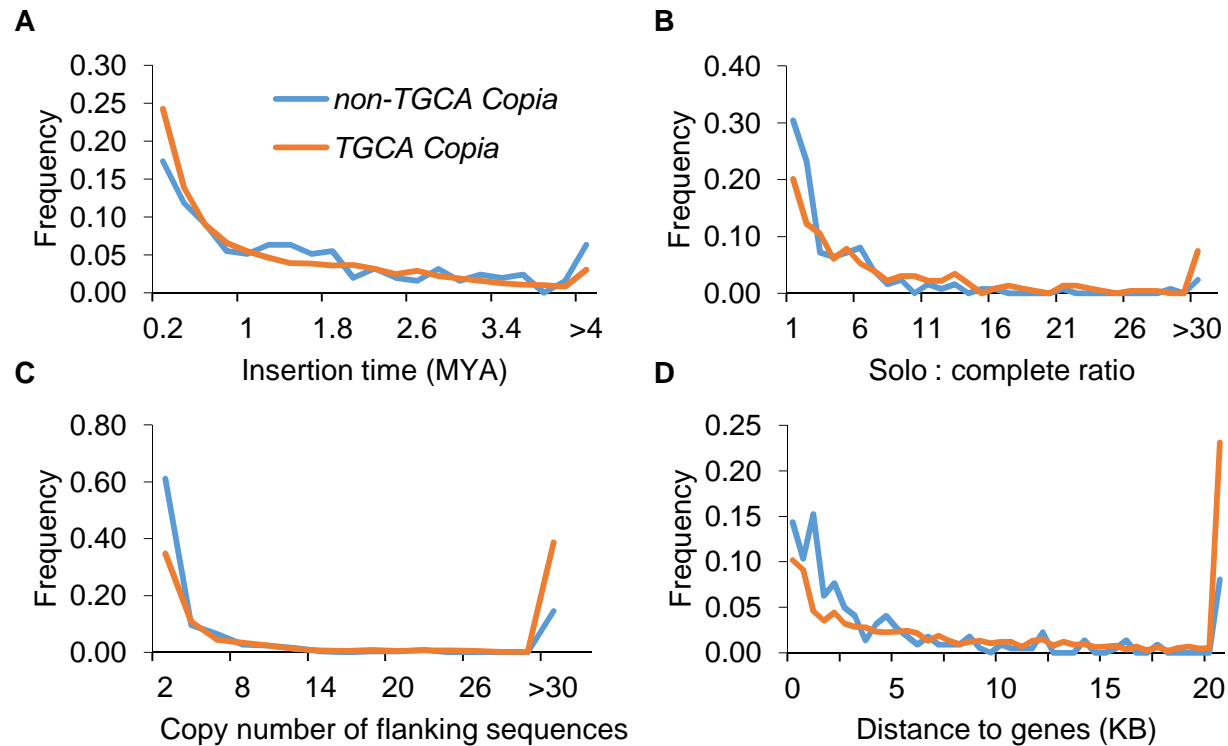

**Fig 5. Characterization of non-canonical *Copia* elements in plants.**

(A) Non-TGCA *Copia* is older than canonical *Copia*. (B) Non-TGCA *Copia* has lower ratio of solo LTR to complete LTR, indicating ineffective exclusion for this type of LTR elements. (C) Non-TGCA *Copia* elements are predominately associated with non-repetitive flanking sequences. (D) Non-TGCA *Copia* elements are located closer to genes than canonical *Copia* elements. Blue lines represent non-TGCA (non-canonical) *Copia* elements and orange lines represent TGCA (canonical) *Copia* elements. All analyses were based on 50 plant genomes.
